# Supplementary material for: Methane activation by gold-doped titanium oxide cluster anions with closed-shell electronic structures
Source: Royal Society of Chemistry journal article supplement (doi:10.1039/c6sc00539j), 2016-01-01
Supplement: c6sc00539j1.pdf [file c6sc00539j1.pdf]

## Supplementary Information for:

# Methane Activation by Gold-Doped Titanium Oxide Cluster Anions with Closed-Shell Electronic Structures

Yan-Xia Zhao<sup>1</sup>, Xiao-Na Li<sup>1</sup>, Zhen Yuan<sup>1,2</sup>, Qing-Yu Liu<sup>1,2</sup>, Qiang Shi<sup>1,\*</sup>, and Sheng-Gui He<sup>1,\*</sup>

<sup>1</sup>Beijing National Laboratory for Molecular Sciences, State Key Laboratory for Structural Chemistry of Unstable and Stable Species, Institute of Chemistry, Chinese Academy of Sciences, Beijing 100190, P. R. China.

<sup>2</sup>University of Chinese Academy of Sciences, Beijing 100049, P. R. China

## Table of Contents

**1. Experimental and computational methods** (pages S2 and S3).

**2. Additional experimental results.**

2.1. Cluster reactivity of  $\text{AuTi}_3\text{O}_8^-$  (page S4).

2.2. Reaction kinetics for  $\text{AuTi}_3\text{O}_7^- + \text{CH}_4$  (pages S5 and S6).

2.3. Reaction kinetics for  $\text{AuTi}_3\text{O}_8^- + \text{CH}_4$  (page S7).

2.4. An experiment to verify that the reactant cluster ions are thermalized (page S8).

**3. Additional computational results.**

3.1. Isomeric structures of clusters (pages S9-S10).

3.2. Additional reaction pathways for the reactions of  $\text{AuTi}_3\text{O}_8^- + \text{CH}_4$  and  $\text{AuTi}_3\text{O}_7^- + \text{CH}_4$  (pages S11-S15).

3.3. Natural bond orbital analysis of the charge and wiberg bond order of critical atoms and chemical bonds involved in the species of Figure 2 in the main text (page S16).

3.4 Coordinates for the low-lying energy isomers of  $\text{AuTi}_3\text{O}_7^-$  and  $\text{AuTi}_3\text{O}_8^-$  clusters shown in Figs. S5 and S6 (pages S17-S23).

## 1. Experimental and computational methods.

The  $\text{Au}^{48}\text{Ti}_x\text{O}_y^-$  cluster anions were generated by the reaction of  $\text{O}_2$  (1%  $\text{O}_2$  seeded in He carrier gas with a backing pressure of 5 standard atmospheres) with metal plasmas generated by laser (energy of 5–8 mJ per pulse at 532 nm and frequency of 10 Hz) vaporization of a solid metal disk compressed with isotope-enriched Ti powder (99.32%  $^{48}\text{Ti}$ , Isoflex, San Francisco) and Au powder (Au/Ti mole ratio = 1/1). The clusters of interest ( $\text{Au}^{48}\text{Ti}_3\text{O}_7^-$  and  $\text{Au}^{48}\text{Ti}_3\text{O}_8^-$ ) were mass-selected by a quadrupole mass filter and entered into a linear ion trap reactor, where they were thermalized by collisions with a 5–8 Pa He gas for about 1.0 ms and then interacted with a pulse of  $\text{CH}_4$ ,  $\text{CD}_4$ , or  $\text{CH}_2\text{D}_2$  for a period of time. A reflectron time-of-flight mass spectrometer was used to detect the cluster ions.<sup>1</sup>

The density functional theory (DFT) calculations using Gaussian 09 program<sup>2</sup> were carried out to investigate the structures of  $\text{AuTi}_3\text{O}_7^-$  and  $\text{AuTi}_3\text{O}_8^-$  clusters and the reaction mechanisms with  $\text{CH}_4$ . The bond dissociation energies of  $\text{AuO}$ ,  $\text{AuH}$ ,  $\text{AuC}^+$ ,  $\text{TiO}$ ,  $\text{H-CH}_3$ ,  $\text{OH}$ ,  $\text{O}_2$  and  $\text{CO}$  were computed by various functionals and compared with available experimental data (Table S1). With the TZVP<sup>3</sup> basis sets for Ti, O, C, and H atoms and a D95V basis set<sup>4</sup> combined with the Stuttgart/Dresden relativistic effective core potential (denoted as SDD in Gaussian software) for Au atom, the TPSS functional<sup>5</sup> is the overall best (see Table S1.) and even better than the popular hybrid B3LYP functional<sup>6-8</sup> which was previously used to study the Au–Ti–O cluster structures,<sup>9</sup> so the results by TPSS are given throughout the main text. A Fortran code based on the genetic algorithm<sup>10</sup> was used to search the global minimum structures of  $\text{AuTi}_3\text{O}_7^-$  and  $\text{AuTi}_3\text{O}_8^-$  clusters with different spin multiplicities. To determine reliable relative energies of low-lying isomeric structures, the single-point energy calculations at the high-level of restricted coupled-cluster method with single, double, and perturbative triple excitations method  $[\text{RCCSD}(\text{T})]$ <sup>11-13</sup> were performed at the TPSS optimized geometries. The reaction mechanism calculations involved geometry optimization of reaction intermediates and transition states. The transition states were optimized with the Berny algorithm.<sup>14</sup> Intrinsic reaction coordinates calculations were performed to check that a transition state connects two appropriate local minima. The zero-point vibration corrected energies ( $\Delta H_0$ ) were reported. The natural bond orbital (NBO) analysis was performed with NBO 3.1.<sup>15</sup>

**Table S1.** DFT calculated and experimental bond dissociation energies of AuO, AuH, AuC<sup>+</sup>, TiO, H-CH<sub>3</sub>, OH, O<sub>2</sub> and CO. The values are in unit of kJ mol<sup>-1</sup>.

|                       |             | Au-O       | Au-H       | Au <sup>+</sup> -C | Ti-O       | H-CH <sub>3</sub> | O-H        | O-O        | C-O         |
|-----------------------|-------------|------------|------------|--------------------|------------|-------------------|------------|------------|-------------|
| Experiments           | Value       | 219        | 314        | 324                | 663        | 438               | 428        | 493        | 1076        |
|                       | Reference   | 16         | 17         | 18                 | 19         | 20                | 20         | 21         | 22          |
| Pure<br>Functionals   | <b>TPSS</b> | <b>216</b> | <b>297</b> | <b>338</b>         | <b>717</b> | <b>432</b>        | <b>421</b> | <b>510</b> | <b>1040</b> |
|                       | BLYP        | 226        | 289        | 352                | 727        | 429               | 4321       | 548        | 1073        |
|                       | BP86        | 236        | 304        | 379                | 759        | 440               | 446        | 573        | 1097        |
|                       | BPW91       | 222        | 286        | 358                | 741        | 424               | 427        | 557        | 1079        |
|                       | M06L        | 196        | 275        | 291                | 676        | 431               | 408        | 499        | 1054        |
|                       | PBE         | 238        | 291        | 374                | 763        | 430               | 433        | 580        | 1102        |
|                       | BPBE        | 223        | 286        | 360                | 741        | 424               | 426        | 559        | 1080        |
| Hybrid<br>Functionals | B3LYP       | 179        | 278        | 279                | 643        | 432               | 425        | 497        | 1042        |
|                       | B1LYP       | 163        | 270        | 254                | 727        | 426               | 415        | 466        | 1019        |
|                       | X3LYP       | 178        | 278        | 276                | 636        | 432               | 424        | 491        | 1041        |
|                       | B1B95       | 170        | 273        | 268                | 636        | 437               | 415        | 497        | 1052        |
|                       | B3P86       | 190        | 291        | 300                | 683        | 443               | 438        | 519        | 1067        |
|                       | B3PW91      | 176        | 276        | 282                | 666        | 428               | 419        | 499        | 1044        |
|                       | PBE1PBE     | 172        | 271        | 271                | 645        | 425               | 414        | 495        | 1043        |
|                       | M05         | 161        | 258        | 204                | 621        | 433               | 415        | 486        | 1051        |
|                       | M06         | 163        | 264        | 244                | 623        | 434               | 415        | 478        | 1056        |
|                       | M052X       | 161        | 276        | 229                | 537        | 434               | 416        | 473        | 1047        |
|                       | M062X       | 140        | 249        | 214                | 565        | 434               | 419        | 482        | 1058        |

## 2. Additional experimental results.

### 2.1. Cluster reactivity of $\text{AuTi}_3\text{O}_8^-$ .

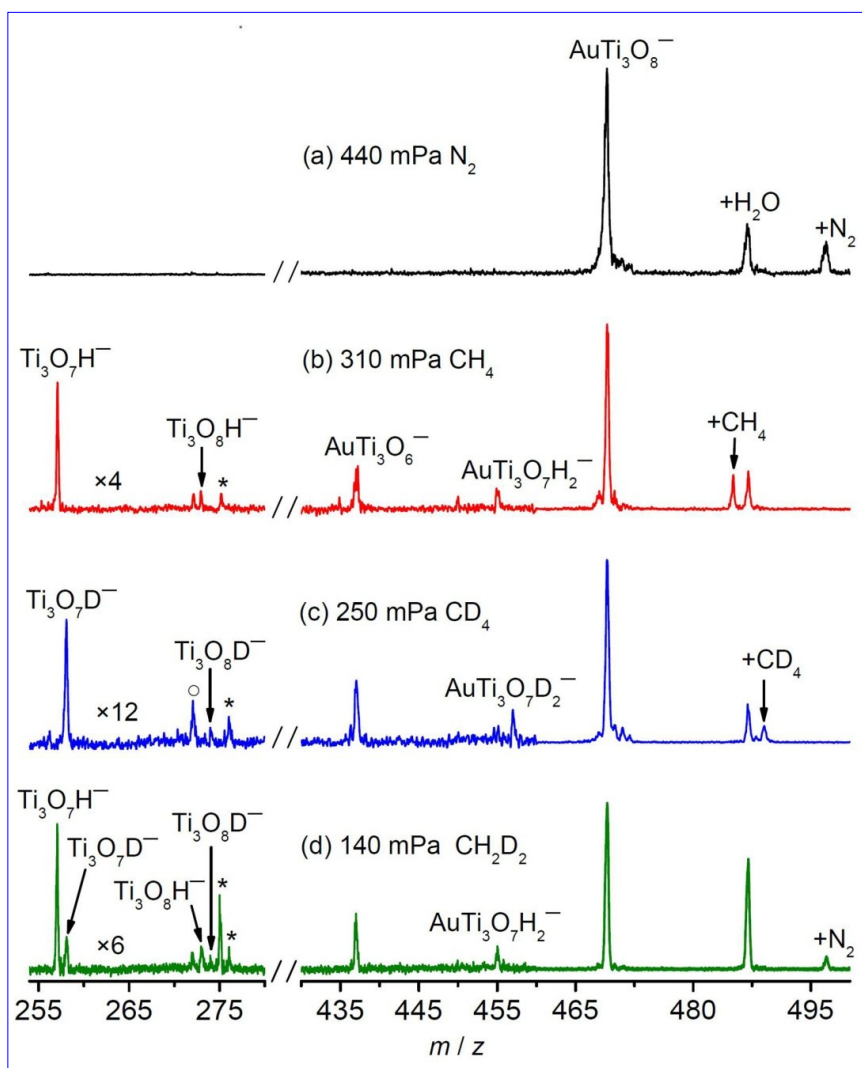

**Fig. S1.** TOF mass spectra for the reactions of mass selected  $\text{AuTi}_3\text{O}_8^-$  with  $\text{N}_2$  (a),  $\text{CH}_4$  (b),  $\text{CD}_4$  (c), and  $\text{CH}_2\text{D}_2$  (d). The peaks marked with asterisk and hollow circle in panels (b) and (d) represent water adsorption products ( $\text{Ti}_3\text{O}_7\text{HH}_2\text{O}^-$  or  $\text{Ti}_3\text{O}_7\text{DH}_2\text{O}^-$ ) and  $\text{Ti}_3\text{O}_8^-$  from collision induced dissociation, respectively. The peaks marked with +X (X =  $\text{H}_2\text{O}$ ,  $\text{CH}_4$ ,  $\text{CD}_4$ , and  $\text{N}_2$ ) in panels (a-d) denote adsorption products by  $\text{AuTi}_3\text{O}_8^-$ . The reactant gas pressures are shown. The reaction time is 9.57 ms for (a-d). The signal magnitudes below  $m/z$  460 are amplified by 4, 12, and 6 for (b), (c), and (d), respectively.

## 2.2. Reaction kinetics for $\text{AuTi}_3\text{O}_7^- + \text{CH}_4$ .

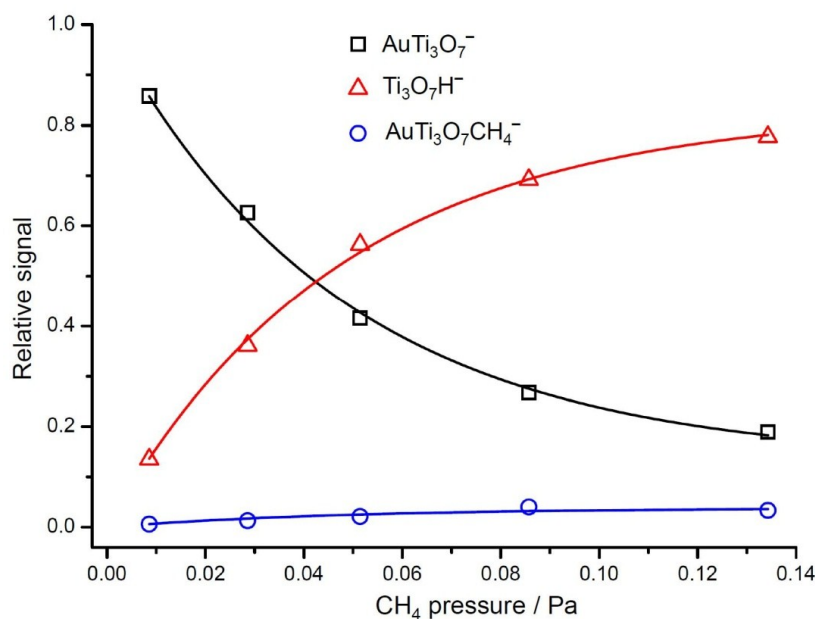

**Fig. S2.** Variation of ion intensities with respect to the  $\text{CH}_4$  pressures in the reaction of  $\text{AuTi}_3\text{O}_7^-$  with  $\text{CH}_4$ . The solid lines are fitted to the experimental data points by using the equations derived with the approximation of the pseudo-first-order reaction mechanism for the reactive species (Equation 11).

In reaction of  $\text{AuTi}_3\text{O}_7^- + \text{CH}_4$ , both  $\text{AuCH}_3$  evaporation channel (Reaction 5 in main text) and methane association channel (Reaction 10) were observed:

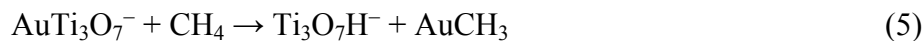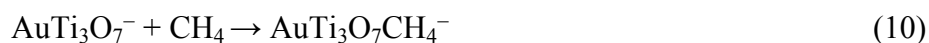

Fig. S2 plots the signal variation of the reactant and product ions with respect to the  $\text{CH}_4$  pressure ( $P$ ). The relative intensity of the reactant cluster  $\text{AuTi}_3\text{O}_7^-$  ( $I_R$ ) decreases from about 1.0 to 0.2 when the  $P$  value increases from 0 to about 0.13 Pa. The decrease of  $I_R$  gradually becomes subdued with the increase of  $P$ , indicating that some of the experimentally generated  $\text{AuTi}_3\text{O}_7^-$  ions were inert toward  $\text{CH}_4$ . It turned out that the  $I_R$  value could be well fitted by the following Equation:

$$I_R = x_{\text{inert}} + (1 - x_{\text{inert}}) \times \exp\left(-k_1 \frac{P}{k_B T} t_R\right) \quad (11)$$

in which  $x_{\text{inert}}$  is the relative intensity of the un-reactive component of  $\text{AuTi}_3\text{O}_7^-$  and  $k_1$  is the pseudo-first-order rate constant of the reactive component of  $\text{AuTi}_3\text{O}_7^-$ ,  $k_B$  is the Boltzmann constant,  $T$  is the temperature ( $\approx 300$  K), and  $t_R$  is the reaction time ( $\approx 1.07$  ms).

The  $x_{\text{inert}}$  and  $k_1$  in Equation 11 were determined to be  $(13 \pm 1) \%$  and  $(8.04 \pm 0.22) \times 10^{-11} \text{ cm}^3 \text{ molecule}^{-1} \text{ s}^{-1}$ , respectively. The uncertainties  $\pm 1\%$  and  $\pm 0.22 \times 10^{-11} \text{ cm}^3 \text{ molecule}^{-1} \text{ s}^{-1}$  are one-standard errors in the least-square fitting. It can be seen that  $(87 \pm 1) \%$  of the experimentally generated  $\text{AuTi}_3\text{O}_7^-$  ions were reactive with  $\text{CH}_4$  and their relative intensity follows a single exponential decay. It is noteworthy that the absolute  $k_1(\text{AuTi}_3\text{O}_7^- + \text{CH}_4)$  value ( $8.04 \times 10^{-11} \text{ cm}^3 \text{ molecule}^{-1} \text{ s}^{-1}$ ) can be over- or under-estimated by 30% due to systematical errors in determining the reaction time  $t_R$  and pressure  $P$ . The branching ratio of Reaction (5) accounts for 96% and that of Reaction (10) accounts for 4%.

### 2.3. Reaction kinetics for $\text{AuTi}_3\text{O}_8^- + \text{CH}_4$ .

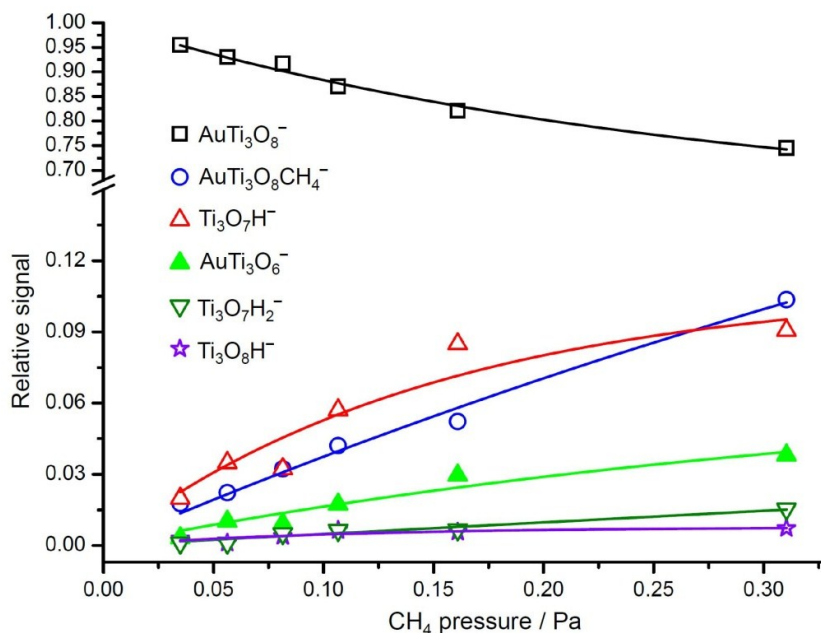

**Fig. S3.** Variation of ion intensities with respect to the  $\text{CH}_4$  pressures in the reaction of  $\text{AuTi}_3\text{O}_8^-$  with  $\text{CH}_4$ . The solid lines are fitted to the experimental data points by using the equations derived with the approximation of the pseudo-first-order reaction mechanism for the reactive species (Equation 11).

Five reaction channels are observed in the reaction of  $\text{AuTi}_3\text{O}_8^- + \text{CH}_4$ :

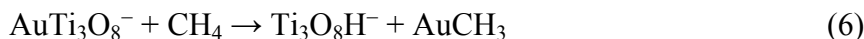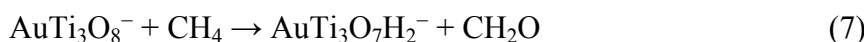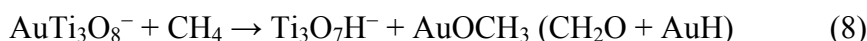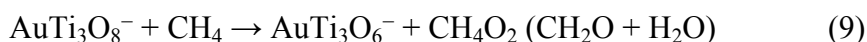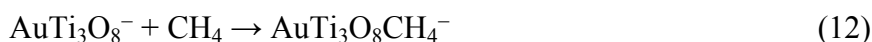

Fig. S3 plots the signal variation of the reactant and product ions with respect to the  $\text{CH}_4$  pressure ( $P$ ). The decrease of  $I_R$  ( $1.0 \rightarrow 0.8$ ) also gradually becomes subdued with the increase of  $P$  ( $0 \rightarrow 0.3$ ), indicating that the un-reactive component of  $\text{AuTi}_3\text{O}_8^-$  ions was also experimentally generated. According to Equation 11, the values of  $x_{\text{inert}}$  and  $k_1(\text{AuTi}_3\text{O}_8^- + \text{CH}_4)$  were determined to be  $(63 \pm 4) \%$  and  $(1.66 \pm 0.25) \times 10^{-12} \text{ cm}^3 \text{ molecule}^{-1} \text{ s}^{-1}$ , respectively. It can be seen that only  $(37 \pm 4) \%$  of the experimentally generated  $\text{AuTi}_3\text{O}_8^-$  ions were reactive with  $\text{CH}_4$ . The total branching ratio of Reactions (6)-(9) accounts for 63% and that of Reaction (12) accounts for 37%.

## 2.4. An experiment to verify that the reactant cluster ions are thermalized.

To verify that the reactant cluster ions are thermalized before the reaction through the collisions with He atoms, an comparison experiment has been conducted for reaction of  $\text{AuTi}_3\text{O}_7^-$  with  $\text{CH}_4$  under the condition of four different cooling times: 0.85 ms, 1.15 ms, 1.45 ms, and 1.85 ms as shown in Fig. S4 (note that the He gas pulse is longer than 3 ms in our experiment). Other conditions such as the cluster generation parameters, reaction time (1.07 ms), and  $\text{CH}_4$  pressure (95 mPa) are identical. The relative intensity of  $\text{AuTi}_3\text{O}_7^-$  before ( $I_0$ ) and after ( $I_R$ ) reactions are analyzed. It turns out that the  $\ln(I_0/I_R)$  values (from Fig. S4) under four different cooling times are identical ( $1.47 \pm 0.05$ ) within the experimental uncertainties. Thus, it is certain that the reactant cluster ions are thermalized even with cooling time of only 0.85 ms. To keep the relative intensities of the minor products such as  $\text{AuTi}_3\text{O}_7\text{H}_2\text{O}^-$  (Fig. S4) from residual  $\text{H}_2\text{O}$  as low as possible, the data shown in Figs. 1 and S1 are collected under the condition of short cooling time (0.85 ms).

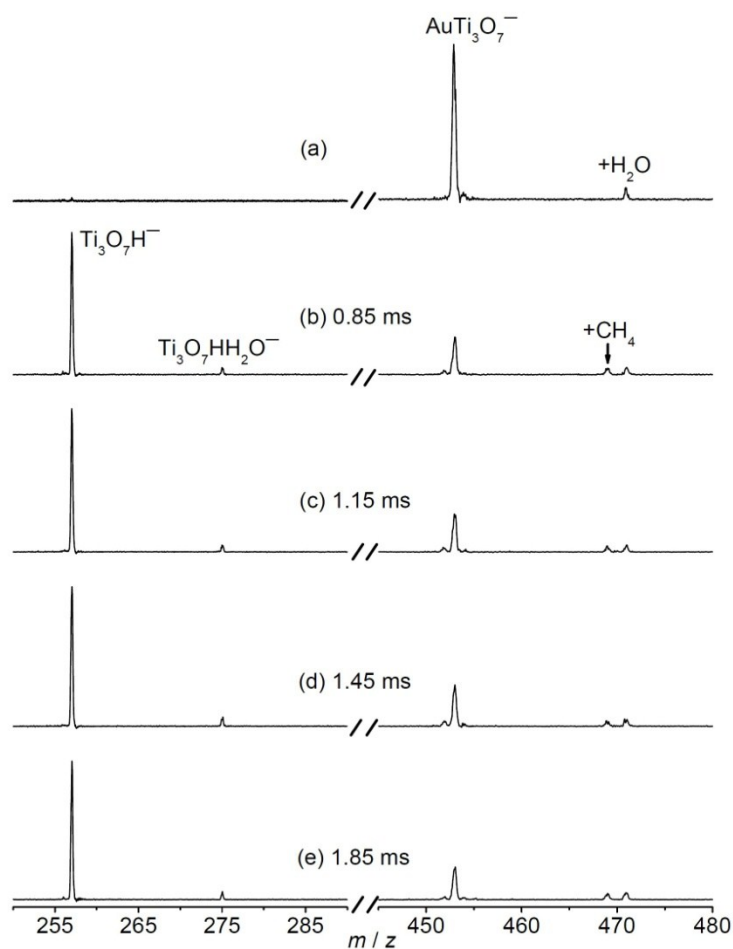

**Fig. S4.** TOF mass spectra for the reactions of mass selected  $\text{AuTi}_3\text{O}_7^-$  (a) with 95 mPa  $\text{CH}_4$  for about 1.07 ms (b–e). The  $\text{AuTi}_3\text{O}_7^-$  cluster ions are cooled for 0.85 ms (b), 1.15 ms (c), 1.45 ms (d), and 1.85 ms (e), respectively.



### 3. Additional computational results

#### 3.1. Isomeric structures of clusters

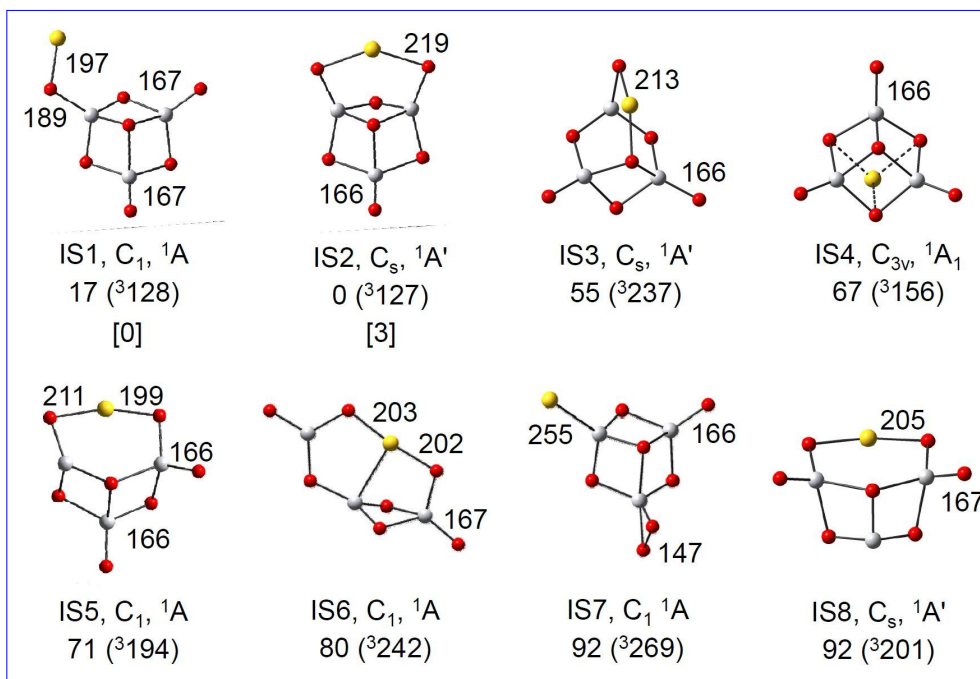

**Fig. S5.** TPSS optimized structures and relative energies of  $\text{AuTi}_3\text{O}_7^-$  cluster isomers. The energies are in unit of  $\text{kJ mol}^{-1}$  and bond lengths are in unit of pm. The triplet state energies are given in the *parenthesis*. The CCSD(T) single-point energies at the TPSS optimized isomeric structures are given in the *square brackets* for the two lowest-energy isomers with singlet state.

Theoretical calculations at TPSS level predicted that the most stable structure of  $\text{AuTi}_3\text{O}_7^-$  cluster is the singlet isomer (IS2) with one two-fold coordinated gold cation ( $\text{Au}_{2f}^+$ ) and one terminal-bonded oxygen anions ( $\text{O}_t^{2-}$ ), whereas the singlet isomer (IS1) with one-fold coordinated gold cation ( $\text{Au}_{1f}^+$ ) and two  $\text{O}_t^{2-}$  ions is higher in energy than IS2 by  $17 \text{ kJ mol}^{-1}$ . In contrast, the CCSD(T) single-point energy of IS1 calculated at the TPSS optimized structure is lower in energy than that of IS2 by  $3 \text{ kJ mol}^{-1}$ . Reaction mechanism calculations demonstrated that IS1 is reactive with methane (Fig. 2 in main text), however, IS2 is inert. Based on the experimental observation that the reactive component of the prepared  $\text{AuTi}_3\text{O}_7^-$  clusters accounts for 87% (Fig. S2), we conclude that IS1 is the lowest-lying isomer of the  $\text{AuTi}_3\text{O}_7^-$  cluster.

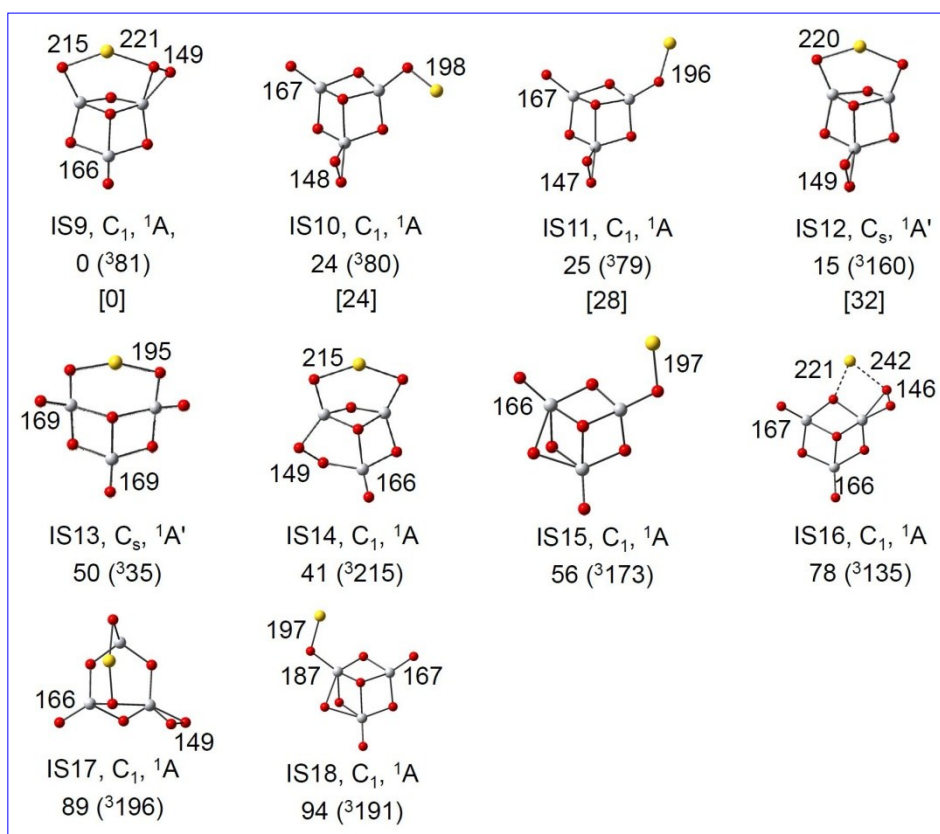

**Fig. S6.** TPSS optimized structures and relative energies of  $\text{AuTi}_3\text{O}_8^-$  cluster isomers. The energies are in unit of  $\text{kJ mol}^{-1}$  and bond lengths are in unit of pm. The triplet state energies are given in the *parenthesis*. The CCSD(T) single-point energies at the TPSS optimized isomeric structures are given in the *square brackets* for the four lowest-energy isomers with singlet state.

For  $\text{AuTi}_3\text{O}_8^-$  cluster, the TPSS functional predicted that the most stable structure is IS9 with one  $\text{Au}_{2f}^+$  cation and one  $\text{O}_t^{2-}$  anion. The energies of IS10 and IS11 with one  $\text{Au}_{1f}^+$  and one  $\text{O}_t^{2-}$  are 24–25  $\text{kJ mol}^{-1}$  higher than that of IS9. The CCSD(T) single-point energy calculations predicted similar energetics for IS9–IS11. Reaction mechanism calculations demonstrate that both IS10 and IS11 are reactive with methane (Fig. 3 in the main text). However, IS9 and IS12 are inert. Based on the experimental observation that the reactive component of the prepared  $\text{AuTi}_3\text{O}_8^-$  clusters only accounts for 37% (Fig. S3), it can be concluded that IS9 can be the lowest-lying isomer of the  $\text{AuTi}_3\text{O}_8^-$  cluster. The low-lying isomers of IS10 and IS11 correspond to the reactive component of  $\text{AuTi}_3\text{O}_8^-$  in experiments.

### 3.2. Additional reaction pathways for the reactions of $\text{AuTi}_3\text{O}_8^- + \text{CH}_4$ .

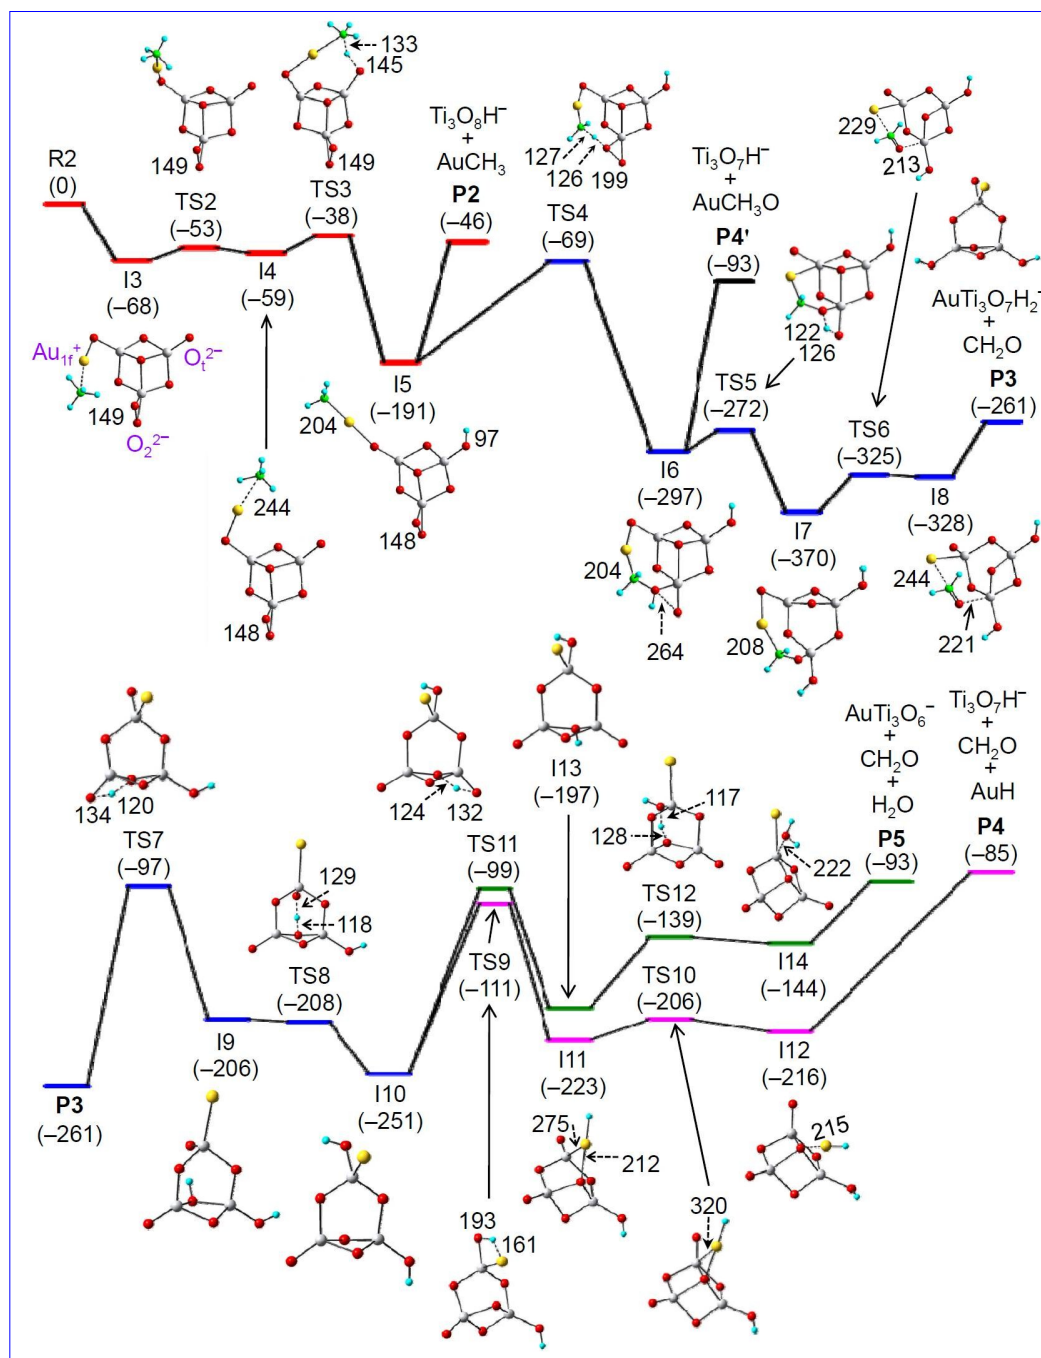

**Fig. S7.** Complete potential energy surface for  $^1\text{AuTi}_3\text{O}_8^-$  (IS10) +  $^1\text{CH}_4$  to generate the products of  $^1\text{Ti}_3\text{O}_8\text{H}^- + ^1\text{AuCH}_3$  (P2),  $^1\text{AuTi}_3\text{O}_7\text{H}_2^- + ^1\text{CH}_2\text{O}$  (P3),  $^1\text{Ti}_3\text{O}_7^- + ^1\text{CH}_2\text{O} + ^1\text{AuH}$  (P4),  $^1\text{Ti}_3\text{O}_7\text{H}^- + ^1\text{AuCH}_3\text{O}$  (P4'), and  $^1\text{AuTi}_3\text{O}_6^- + ^1\text{CH}_2\text{O} + ^1\text{H}_2\text{O}$  (P5). The dispersion corrected energies of the reaction intermediates (I3–I14), transition states (TS2–TS12), and products (P2–P5 and P4') with respect to the separated reactants [R2,  $^1\text{AuTi}_3\text{O}_8^-$  (IS10) +  $^1\text{CH}_4$ ] are given in  $\text{kJ mol}^{-1}$ . Bond lengths are given in pm. Note that the intermediate I4 can also be formed by adsorption of  $\text{CH}_4$  onto  $\text{AuTi}_3\text{O}_8^-$  (IS11).

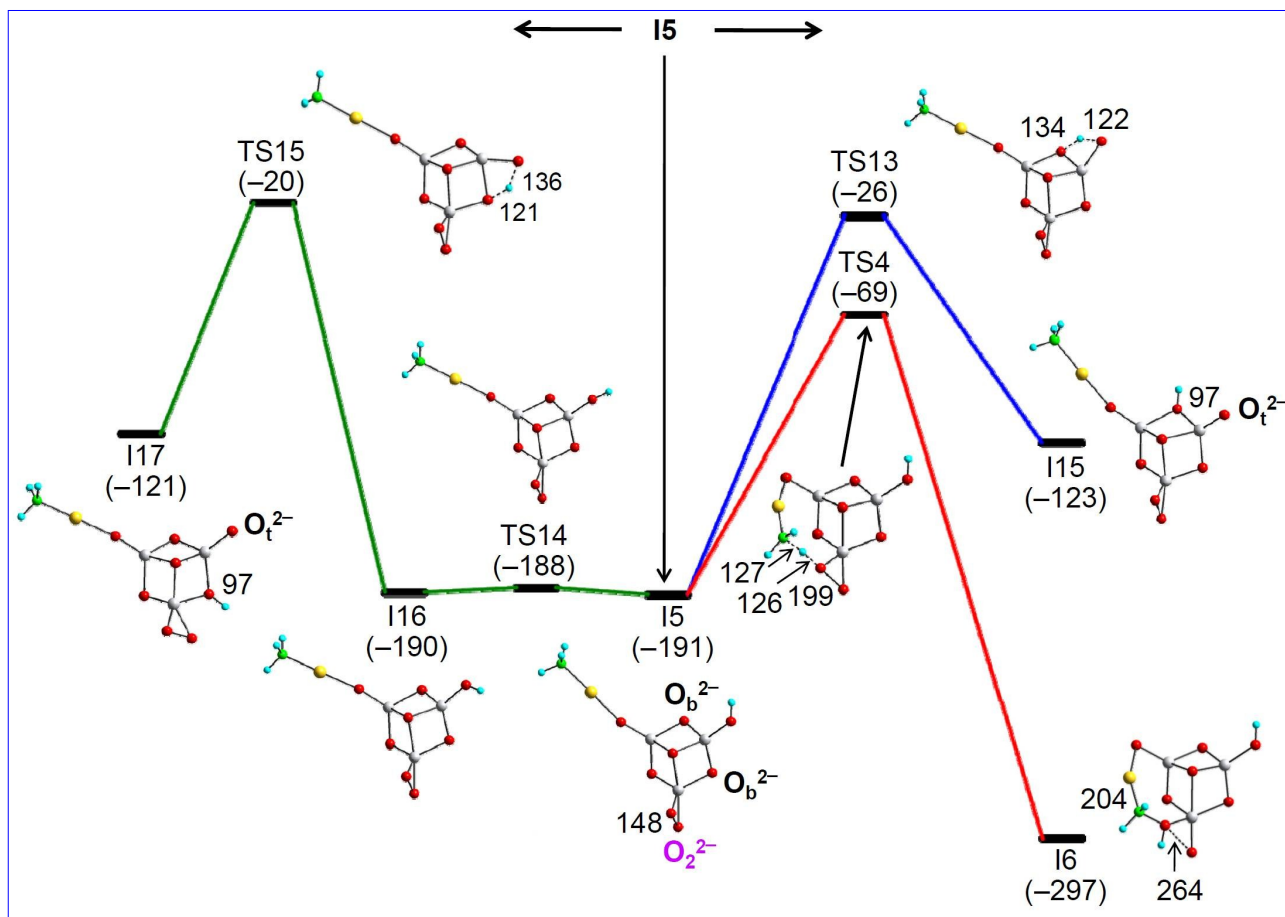

**Fig. S8.** Possible reaction pathways for complex rearrangement starting from the I5 (Fig. 3 in main text and Fig. S7) in  $^1\text{AuTi}_3\text{O}_8^-$  (IS10) +  $^1\text{CH}_4$ . The dispersion corrected energies of the reaction intermediates (I5, I6, and I15–I17) and transition states (TS4 and TS13–TS15) with respect to the separated reactants [R2,  $^1\text{AuTi}_3\text{O}_8^-$  (IS10) +  $^1\text{CH}_4$ ] are given in  $\text{kJ mol}^{-1}$ . Bond lengths are given in pm.

In the reaction of  $\text{AuTi}_3\text{O}_8^-$  (IS10) +  $\text{CH}_4$ , the second C–H bond can be activated by the peroxide ion  $\text{O}_2^{2-}$  ( $\text{I5} \rightarrow \text{TS4} \rightarrow \text{I6}$ ). Alternatively, the H atom of OH group in I5 may be transferred to the adjacent bridging O atoms ( $\text{O}_b^{2-}$ ) ( $\text{I5} \rightarrow \text{TS13} \rightarrow \text{I15}$  and  $\text{I5} \rightarrow \text{TS14} \rightarrow \text{I16}$ ) to generate a terminal oxygen atom ( $\text{O}_t^{2-}$ , see I15 and I17) for activating the second C–H bond. However, the relative energies of TS13 ( $-26 \text{ kJ mol}^{-1}$ ) and TS15 ( $-20 \text{ kJ mol}^{-1}$ ) are higher than that of TS4 ( $-69 \text{ kJ mol}^{-1}$ ). Thus, activation of the second C–H bond by the  $\text{O}_2^{2-}$  unit is more favourable.

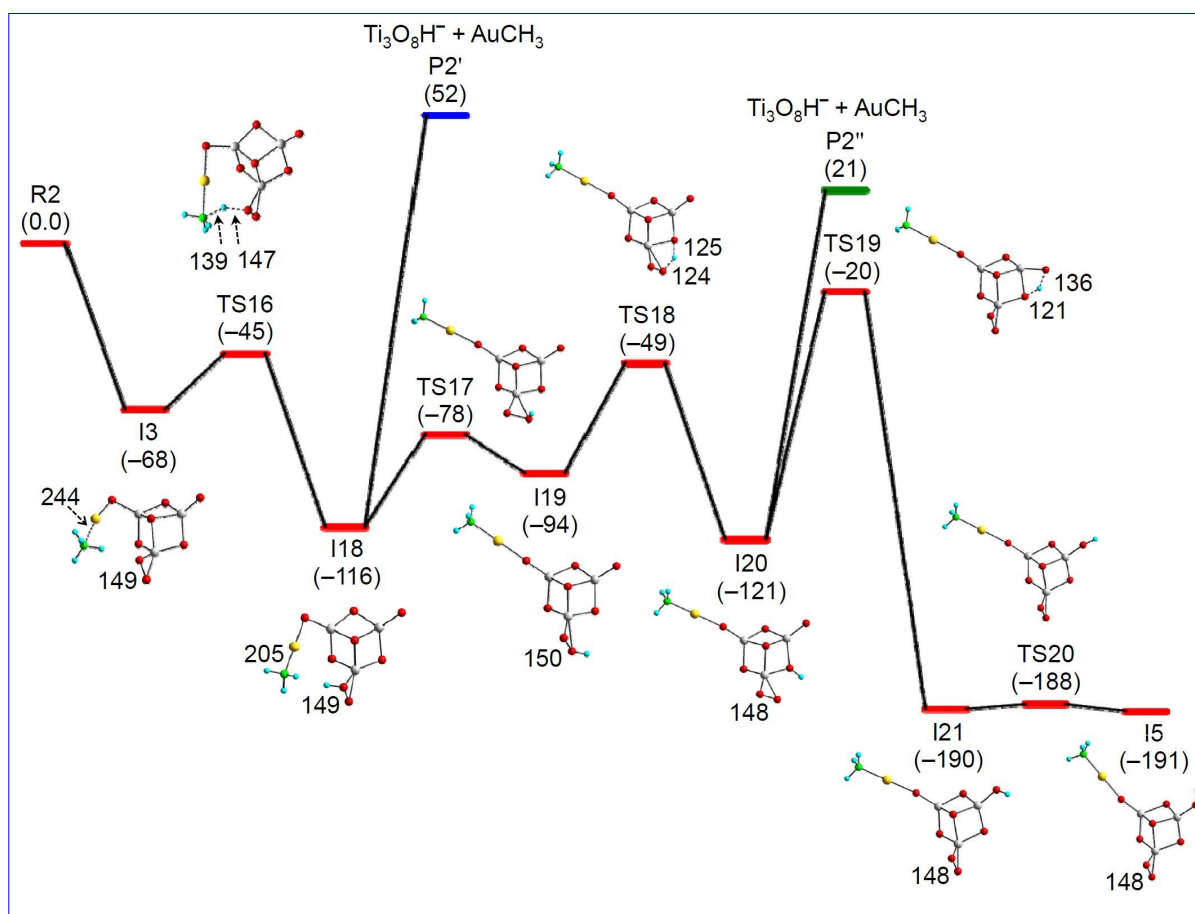

**Fig. S9.** Additional reaction pathway for formation of intermediate I5 (Fig. 3 in main text and Fig. S7) in  $^1\text{AuTi}_3\text{O}_8^-$  (IS10) +  $^1\text{CH}_4$ . The dispersion corrected energies of the reaction intermediates (I3, I5, and I18–I21), transition states (TS16–TS20), and products (P2' and P2'') with respect to the separated reactants [R2,  $^1\text{AuTi}_3\text{O}_8^-$  (IS10) +  $^1\text{CH}_4$ ] are given in kJ mol<sup>-1</sup>. Bond lengths are given in pm.

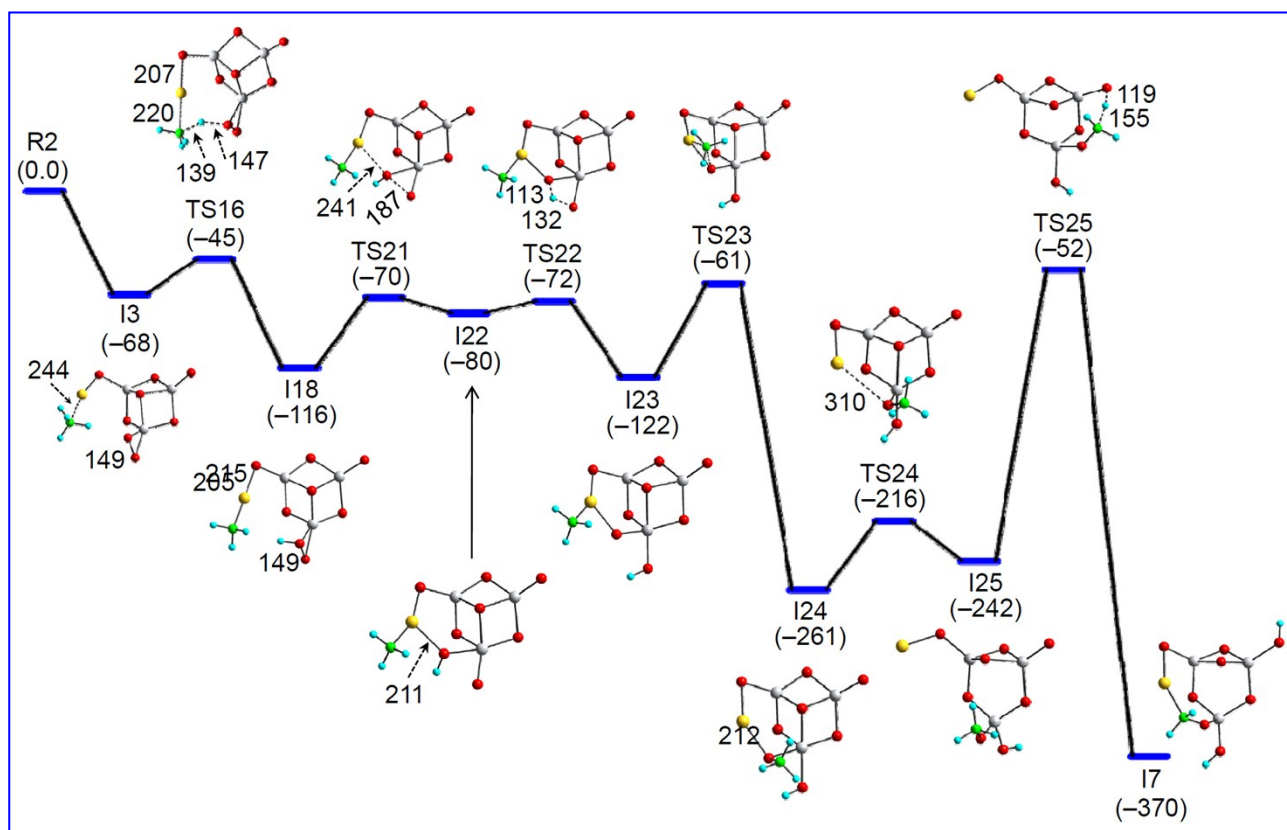

**Fig. S10.** Additional reaction pathway for formation of intermediate I7 (Fig. 3 in main text and Fig. S7) in  $^1\text{AuTi}_3\text{O}_8^-$  (IS10) +  $^1\text{CH}_4$ . The dispersion corrected energies of the reaction intermediates (I3, I7, I18, and I22–I25) and transition states (TS16 and TS21–TS25) with respect to the separated reactants [R2,  $^1\text{AuTi}_3\text{O}_8^-$  (IS10) +  $^1\text{CH}_4$ ] are given in kJ mol<sup>-1</sup>. Bond lengths are given in pm.



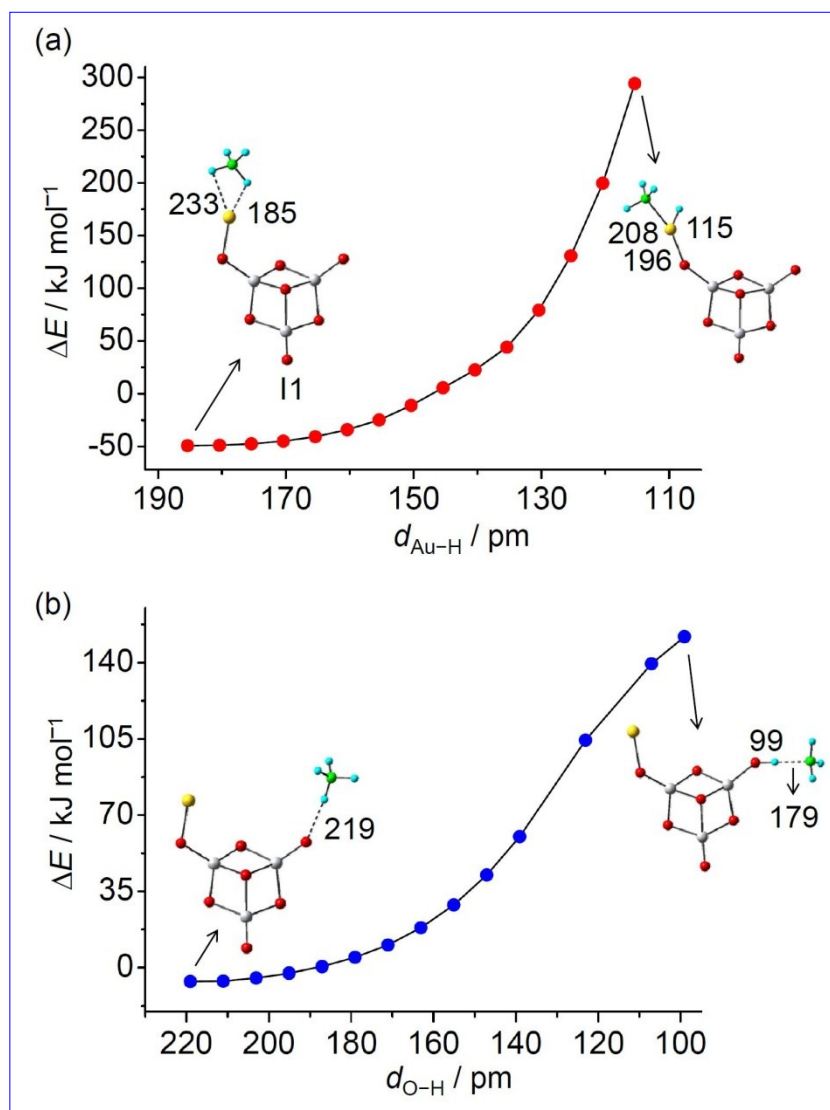

**Fig. S11.** Reaction pathways for C-H bond activation of methane by single  $\text{Au}_{1f}^+$  ion (a) and single  $\text{O}_t^{2-}$  ion (b) in  $\text{AuTi}_3\text{O}_7^-$  (IS1) along singlet potential energy surface. The energies of the reaction complexes are with respect to the separated reactants [ $^1\text{AuTi}_3\text{O}_7^-$  (IS1) +  $^1\text{CH}_4$ ] without zero-point vibrational energy corrections. Bond lengths are given in pm.

### 3.3. Natural bond orbital analysis of the charge and wiberg bond order of critical atoms and chemical bonds involved in the species of Figure 2 in the main text.

Table S2. NBO charges (e) of Au, O bonded with Au ( $O_{Au}$ ), transferring H,  $CH_3$  group, and O accepting H ( $O_H$ ) in the species of Figure 2 at TPSS functional level.

|          | Au    | $O_{Au}$ | $CH_3$ | H     | $O_H$ | $Ti_3O_7$ |
|----------|-------|----------|--------|-------|-------|-----------|
| Reactant | +0.42 | -0.75    | -0.20  | +0.20 | -0.62 | -1.42     |
| I1       | +0.44 | -0.81    | -0.11  | +0.18 | -0.63 | -1.51     |
| TS1      | +0.49 | -0.75    | -0.31  | +0.37 | -0.75 | -1.54     |
| I2       | +0.28 | -0.70    | -0.41  | +0.47 | -0.84 | -1.34     |
| Product  | +0.15 | -0.62    | -0.15  | +0.46 | -0.86 | -1.46     |

Table S3. Wiberg bond orders of some important bonds in the species of Figure 2 at TPSS functional level. The Ti atoms bonded with  $O_{Au}$  and  $O_H$  are denoted as Ti(1) and Ti(2), respectively.

|          | Au- $O_{Au}$ | Au-C | Ti(1)- $O_{Au}$ | Ti(2)- $O_H$ | C-H  | O-H  |
|----------|--------------|------|-----------------|--------------|------|------|
| Reactant | 0.83         |      | 0.99            | 2.0          | 0.96 |      |
| I1       | 0.72         |      | 1.03            | 1.99         | 0.83 |      |
| TS1      | 0.46         | 0.34 | 1.32            | 1.54         | 0.53 | 0.23 |
| I2       | 0.27         | 0.78 | 1.59            | 0.98         |      | 0.76 |
| Product  |              | 1.01 | 2.0             | 0.95         |      | 0.77 |



**3.4 Coordinates for the low-lying energy isomers of  $\text{AuTi}_3\text{O}_7^-$  and  $\text{AuTi}_3\text{O}_8^-$  clusters shown in Figs. S5 and S6. All the coordinates (unit in 0.1 nm) are obtained at TPSS functional level.**

$\text{AuTi}_3\text{O}_7^-$ ,  $^1\text{IS1}$

|    |             |             |             |
|----|-------------|-------------|-------------|
| Au | 2.74381000  | 0.01478900  | -0.10831300 |
| Ti | -3.08751600 | -0.98154300 | -0.12158800 |
| Ti | -0.34757300 | -0.62494800 | 0.38204800  |
| Ti | -2.00479100 | 1.62544900  | 0.08141100  |
| O  | -2.02099400 | 3.17884300  | -0.53137200 |
| O  | -1.51210000 | -0.02678700 | -1.00976900 |
| O  | -1.64587500 | -1.74284000 | 0.95052600  |
| O  | -4.16727400 | -1.95699500 | -0.93726200 |
| O  | -3.61531800 | 0.73166600  | 0.45364400  |
| O  | 1.34954800  | -1.36963900 | 0.02368800  |
| O  | -0.52344300 | 0.98757500  | 1.17999100  |

$\text{AuTi}_3\text{O}_7^-$ ,  $^1\text{IS2}$

|    |             |             |             |
|----|-------------|-------------|-------------|
| Au | -0.17459600 | -1.83644700 | 0.00000000  |
| Ti | -0.28378700 | 2.84429000  | 0.00000000  |
| Ti | 0.42667800  | 0.48326500  | 1.37220500  |
| Ti | 0.42667800  | 0.48326500  | -1.37220500 |
| O  | -0.02686900 | -1.12723500 | -2.07036100 |
| O  | -0.87066100 | 0.91724500  | 0.00000000  |
| O  | 0.42667800  | 2.30473700  | 1.74389900  |
| O  | -1.44739300 | 4.02651900  | 0.00000000  |
| O  | 0.42667800  | 2.30473700  | -1.74389900 |
| O  | -0.02686900 | -1.12723500 | 2.07036100  |
| O  | 1.67625800  | 0.35639100  | 0.00000000  |

$\text{AuTi}_3\text{O}_7^-$ ,  $^1\text{IS3}$

|    |             |             |             |
|----|-------------|-------------|-------------|
| Au | -1.28356800 | 0.52262400  | 0.00000000  |
| Ti | 0.86425200  | -1.18775000 | 1.37257800  |
| Ti | 0.86425200  | -1.18775000 | -1.37257800 |
| Ti | 1.00606600  | 1.72498900  | 0.00000000  |
| O  | 1.35443200  | 0.74455500  | -1.45610600 |
| O  | -0.60331300 | 2.54152800  | 0.00000000  |

|   |             |             |             |
|---|-------------|-------------|-------------|
| O | 1.35443200  | 0.74455500  | 1.45610600  |
| O | 0.86425200  | -2.07010000 | 2.78388300  |
| O | 0.86425200  | -2.07010000 | -2.78388300 |
| O | 1.96465000  | -1.82424400 | 0.00000000  |
| O | -0.64354000 | -1.43820000 | 0.00000000  |

#### AuTi<sub>3</sub>O<sub>7</sub><sup>-</sup>, <sup>1</sup>IS4

---

|    |             |             |             |
|----|-------------|-------------|-------------|
| Au | -1.46303600 | 0.01235700  | -0.00005600 |
| Ti | 0.89856800  | -0.83798200 | -1.43264000 |
| Ti | 0.89849100  | -0.83294600 | 1.43562400  |
| Ti | 0.92555000  | 1.64874400  | -0.00287200 |
| O  | 1.60846200  | 3.16444500  | -0.00553400 |
| O  | 2.01832500  | -0.02104500 | 0.00009300  |
| O  | 0.05373000  | -1.86707300 | 0.00323500  |
| O  | 1.55642800  | -1.60876400 | -2.75046300 |
| O  | 0.08362000  | 0.93240500  | -1.61822200 |
| O  | 1.55626900  | -1.59908800 | 2.75619800  |
| O  | 0.08347200  | 0.93810300  | 1.61493400  |

#### AuTi<sub>3</sub>O<sub>7</sub><sup>-</sup>, <sup>1</sup>IS5

---

|    |             |             |             |
|----|-------------|-------------|-------------|
| Ti | 2.47714100  | -0.46472700 | -0.41658500 |
| Ti | 0.64087200  | 1.75505000  | 0.19503400  |
| Ti | 0.17879100  | -1.69699900 | 0.66777000  |
| O  | -1.54941900 | -2.03980600 | 0.38440900  |
| O  | 1.06524200  | 3.08183900  | 1.10272900  |
| O  | 2.01012400  | 1.18600800  | -1.04042800 |
| O  | 4.07108800  | -0.71444900 | -0.00360100 |
| O  | 1.10360000  | -0.13138300 | 1.09677700  |
| O  | 1.32355500  | -2.11774300 | -0.60037100 |
| O  | -1.12649800 | 1.90400100  | -0.46024900 |
| Au | -1.61659800 | -0.00507400 | -0.17279700 |

#### AuTi<sub>3</sub>O<sub>7</sub><sup>-</sup>, <sup>1</sup>IS6

---

|    |             |            |             |
|----|-------------|------------|-------------|
| Ti | -0.26041000 | 1.63140700 | 0.00041200  |
| Ti | 2.78484700  | 0.58413600 | -0.00079300 |
| Ti | -2.61854700 | 0.37125100 | -0.00005200 |

|    |             |             |             |
|----|-------------|-------------|-------------|
| O  | -1.88975000 | -1.31968200 | -0.00129100 |
| O  | 4.44182700  | 0.77676700  | 0.00036200  |
| O  | 1.57011800  | 2.02462800  | -0.00017000 |
| O  | -4.28343700 | 0.47469500  | -0.00002900 |
| O  | -1.43721900 | 1.42028500  | 1.29828100  |
| O  | -1.43727500 | 1.42149500  | -1.29749500 |
| O  | 2.14995100  | -1.10937700 | 0.00146000  |
| Au | 0.11590800  | -1.09392400 | 0.00000700  |

#### AuTi<sub>3</sub>O<sub>7</sub><sup>-</sup>, <sup>1</sup>IS7

---

|    |             |             |             |
|----|-------------|-------------|-------------|
| Ti | 2.38299300  | -1.12766000 | -0.16460100 |
| Ti | -0.16004300 | 0.12577800  | -0.36862100 |
| Ti | 2.06704500  | 1.73369900  | 0.05449800  |
| O  | 2.58671500  | 3.11461200  | 0.82126500  |
| O  | 1.12781200  | 0.19776400  | 0.96806800  |
| O  | 0.75836200  | -1.19491700 | -1.18294200 |
| O  | 2.80243500  | -2.25556600 | 1.25683000  |
| O  | 3.29033500  | 0.42778000  | -0.55787500 |
| O  | 0.42819000  | 1.68784000  | -1.01032900 |
| O  | 3.38802500  | -2.67760000 | -0.04279000 |
| Au | -2.65107400 | -0.13290200 | 0.10777300  |

#### AuTi<sub>3</sub>O<sub>7</sub><sup>-</sup>, <sup>1</sup>IS8

---

|    |             |             |             |
|----|-------------|-------------|-------------|
| Ti | -0.37627500 | -2.53062000 | 0.00000000  |
| Ti | -0.50687400 | -0.38417600 | 1.87404200  |
| Ti | -0.50687400 | -0.38417600 | -1.87404200 |
| O  | 0.47810600  | 1.14000100  | -2.02893700 |
| O  | -1.57498800 | -0.57284700 | 3.13968800  |
| O  | 0.47810600  | -2.13484900 | 1.47270400  |
| O  | -1.57498800 | -0.57284700 | -3.13968800 |
| O  | -1.37687700 | -1.03454900 | 0.00000000  |
| O  | 0.47810600  | -2.13484900 | -1.47270400 |
| O  | 0.47810600  | 1.14000100  | 2.02893700  |
| Au | 0.65184800  | 1.34097300  | 0.00000000  |

AuTi<sub>3</sub>O<sub>8</sub><sup>-</sup>, <sup>1</sup>IS9

---

|    |             |             |             |
|----|-------------|-------------|-------------|
| Au | 1.81522800  | -0.20843200 | -0.24276700 |
| Ti | -0.57305400 | 1.43693300  | 0.38963900  |
| Ti | -0.51412300 | -1.33854100 | 0.56166800  |
| Ti | -2.87783700 | -0.11739100 | -0.27177200 |
| O  | 1.14140400  | 1.86032100  | -0.65420100 |
| O  | -4.05756700 | -0.24140200 | -1.43247900 |
| O  | -0.35287500 | 0.14395600  | 1.68849300  |
| O  | 0.84107600  | 2.70130600  | 0.53544400  |
| O  | -2.38077300 | 1.66840900  | 0.37588400  |
| O  | 1.07151500  | -2.17075500 | 0.22406400  |
| O  | -0.96485500 | -0.10407000 | -0.84170200 |
| O  | -2.31951700 | -1.74725100 | 0.63310200  |

AuTi<sub>3</sub>O<sub>8</sub><sup>-</sup>, <sup>1</sup>IS10

---

|    |             |             |             |
|----|-------------|-------------|-------------|
| Au | -2.86106300 | 0.05889700  | 0.09415800  |
| Ti | 2.08654800  | 1.41395000  | -0.22184800 |
| Ti | 0.23808000  | -0.74436400 | -0.35780800 |
| Ti | 2.91343000  | -1.31522400 | 0.13546800  |
| O  | 2.01381100  | 2.69743800  | 1.14853800  |
| O  | 3.92427700  | -2.33740300 | 0.97854200  |
| O  | 0.58883600  | 0.82314000  | -1.23303100 |
| O  | 2.39226200  | 3.25339800  | -0.16829500 |
| O  | 3.53289500  | 0.33713400  | -0.57262600 |
| O  | -1.48124700 | -1.35957600 | 0.05426600  |
| O  | 1.45996200  | -0.21742100 | 0.98170000  |
| O  | 1.41754300  | -2.00281600 | -0.89738500 |

AuTi<sub>3</sub>O<sub>8</sub><sup>-</sup>, <sup>1</sup>IS11

---

|    |             |             |             |
|----|-------------|-------------|-------------|
| Au | 3.08828100  | -0.10327600 | 0.09260200  |
| Ti | -3.03538700 | -0.86153900 | -0.11759500 |
| Ti | -0.25939700 | -0.31432700 | -0.36862000 |
| Ti | -2.00921200 | 1.81873700  | -0.00345000 |
| O  | -3.73036300 | -1.80533400 | 1.35370300  |
| O  | -2.15558700 | 3.30959900  | 0.72820800  |
| O  | -1.52309000 | -1.39898600 | -1.12463900 |

|   |             |             |             |
|---|-------------|-------------|-------------|
| O | -4.40789000 | -2.11269900 | 0.07979200  |
| O | -3.52840300 | 0.84608800  | -0.59458700 |
| O | 1.38049000  | -1.07603500 | 0.06508300  |
| O | -1.51411800 | 0.13569400  | 0.96992800  |
| O | -0.43182400 | 1.35363000  | -1.04535600 |

#### AuTi<sub>3</sub>O<sub>8</sub><sup>-</sup>, <sup>1</sup>IS12

---

|    |             |             |             |
|----|-------------|-------------|-------------|
| Au | -2.00008900 | -0.00000600 | -0.27676900 |
| Ti | 0.28217300  | -1.35932100 | 0.50818800  |
| Ti | 0.28117100  | 1.35842400  | 0.50780700  |
| Ti | 2.75735400  | 0.00057100  | -0.02555000 |
| O  | -1.28040800 | -2.06945100 | -0.05962100 |
| O  | 3.57741900  | -0.00095100 | -1.68968100 |
| O  | 0.01336000  | -0.00037800 | 1.74364400  |
| O  | 4.53839400  | 0.00134700  | -0.55370000 |
| O  | 2.13025100  | -1.65703100 | 0.68373400  |
| O  | -1.28135200 | 2.06980700  | -0.05815900 |
| O  | 0.79247200  | -0.00060200 | -0.73951700 |
| O  | 2.12882100  | 1.65821700  | 0.68267100  |

#### AuTi<sub>3</sub>O<sub>8</sub><sup>-</sup>, <sup>1</sup>IS13

---

|    |             |             |             |
|----|-------------|-------------|-------------|
| Ti | -2.05540500 | 1.50171900  | 0.00000000  |
| Ti | -0.01882900 | 0.59974100  | 1.79947000  |
| Ti | -0.01882900 | 0.59974100  | -1.79947000 |
| O  | 0.66630000  | -1.20504300 | -1.91837100 |
| O  | 0.66630000  | 1.51595500  | 3.04731200  |
| O  | -1.88452700 | 0.67480100  | 1.69583400  |
| O  | -2.82385800 | 3.00741900  | 0.00000000  |
| O  | -0.05518700 | 1.47275300  | 0.00000000  |
| O  | -1.88452700 | 0.67480100  | -1.69583400 |
| O  | 0.66630000  | -1.20504300 | 1.91837100  |
| Au | 0.98621000  | -1.40555900 | 0.00000000  |
| O  | 0.66630000  | 1.51595500  | -3.04731200 |

#### AuTi<sub>3</sub>O<sub>8</sub><sup>-</sup>, <sup>1</sup>IS14

---

|    |             |             |             |
|----|-------------|-------------|-------------|
| Au | -1.94544200 | -0.02318200 | -0.22070800 |
|----|-------------|-------------|-------------|

|    |             |             |             |
|----|-------------|-------------|-------------|
| Ti | 0.30100900  | -1.33428000 | 0.56295600  |
| Ti | 0.46054400  | 1.42873600  | 0.28378600  |
| Ti | 2.80806000  | -0.42710200 | -0.27301300 |
| O  | 0.93204100  | -0.09167300 | -0.84332700 |
| O  | 3.91469400  | -0.70380600 | -1.47705500 |
| O  | 0.25358600  | 0.14360600  | 1.66427200  |
| O  | -1.30951200 | -2.04551100 | 0.14124200  |
| O  | 2.04962600  | -1.96611900 | 0.57960400  |
| O  | -1.16355500 | 1.98407200  | -0.19926800 |
| O  | 2.00859900  | 2.49215100  | 0.05810100  |
| O  | 2.70932400  | 1.33097600  | 0.67817100  |

#### AuTi<sub>3</sub>O<sub>8</sub><sup>-</sup>, <sup>1</sup>IS15

---

|    |             |             |             |
|----|-------------|-------------|-------------|
| Au | -2.90057100 | 0.02906500  | -0.09202000 |
| Ti | 1.91431500  | 1.58441500  | 0.01110400  |
| Ti | 0.20747000  | -0.63682300 | 0.34634700  |
| Ti | 2.94692900  | -1.07512500 | -0.15381000 |
| O  | 3.46267800  | 0.59164500  | 0.99385500  |
| O  | 1.33461800  | -0.10255800 | -1.06446100 |
| O  | 3.73248400  | 0.78865600  | -0.47340500 |
| O  | 1.80811800  | 3.18365700  | -0.41745200 |
| O  | 3.94276800  | -2.25544300 | -0.75564200 |
| O  | -1.51189900 | -1.35955500 | 0.02536400  |
| O  | 1.49490000  | -1.76607900 | 0.92429600  |
| O  | 0.44050500  | 0.98337900  | 1.11612400  |

#### AuTi<sub>3</sub>O<sub>8</sub><sup>-</sup>, <sup>1</sup>IS16

---

|    |             |             |             |
|----|-------------|-------------|-------------|
| Au | 2.33982300  | 0.17410500  | -0.08686900 |
| Ti | -0.47422700 | -1.17127700 | 0.06650300  |
| Ti | -1.19205200 | 1.63359500  | 0.09599000  |
| Ti | -3.16731800 | -0.37009700 | -0.21183800 |
| O  | 1.34608800  | -2.03501700 | -0.02771600 |
| O  | -1.65223400 | -0.04919400 | 1.10873100  |
| O  | -1.89001600 | -1.70570300 | -0.88513100 |
| O  | 0.54177400  | -2.37300000 | 1.14150000  |
| O  | -4.70411000 | -0.79657100 | 0.26621400  |

|   |             |            |             |
|---|-------------|------------|-------------|
| O | -0.84938300 | 3.09684300 | 0.82164800  |
| O | 0.22332300  | 0.50132000 | -0.64170900 |
| O | -2.82879900 | 1.38843100 | -0.79000800 |

#### AuTi<sub>3</sub>O<sub>8</sub><sup>-</sup>, <sup>1</sup>IS17

---

|    |             |             |             |
|----|-------------|-------------|-------------|
| Au | -1.23061400 | -0.43231700 | -0.68101700 |
| Ti | 1.89051200  | -0.66638400 | 0.22551800  |
| Ti | 0.73190600  | 1.85708400  | -0.19272800 |
| Ti | -0.90061500 | 0.02572500  | 1.82186100  |
| O  | -0.50064200 | 1.70692200  | 1.36677400  |
| O  | -2.40345600 | -0.64730300 | 1.10604100  |
| O  | 2.60947700  | -1.89734400 | -1.00431400 |
| O  | 0.58547900  | -0.98362700 | 1.64377800  |
| O  | 3.30419400  | -1.85330000 | 0.30973600  |
| O  | 0.84437900  | 3.32155000  | -0.97359700 |
| O  | 2.34337900  | 1.09497400  | 0.45292400  |
| O  | 0.63455100  | 0.18208600  | -1.27659000 |

#### AuTi<sub>3</sub>O<sub>8</sub><sup>-</sup>, <sup>1</sup>IS18

---

|    |             |             |             |
|----|-------------|-------------|-------------|
| Au | 2.78336000  | 0.00357000  | -0.10994900 |
| Ti | -0.31625400 | -0.65953000 | 0.29005300  |
| Ti | -1.73671600 | 1.75501500  | 0.13853700  |
| Ti | -3.11857200 | -0.73519500 | -0.23210100 |
| O  | -1.83976900 | -1.44612000 | 1.32312900  |
| O  | -1.38651200 | 0.16681800  | -1.04333900 |
| O  | -1.62881500 | -2.19906500 | 0.03120600  |
| O  | 1.37819400  | -1.38158300 | -0.02216900 |
| O  | -4.45345000 | -1.41334600 | -0.94869200 |
| O  | -1.58749000 | 3.33169900  | -0.39980900 |
| O  | -3.42977300 | 0.99607300  | 0.42958400  |
| O  | -0.31632300 | 0.91946900  | 1.17549100  |

## References

- 1 Z. Yuan, Z.-Y. Li, Z.-X. Zhou, Q.-Y. Liu, Y.-X. Zhao and S.-G. He, *J. Phys. Chem. C*, 2014, **118**, 14967–14976.
- 2 M. J. Frisch, G. W. Trucks, H. B. Schlegel, G. E. Scuseria, M. A. Robb, J. R. Cheeseman, G. Scalmani, V. Barone, B. Mennucci, G. A. Petersson, H. Nakatsuji, M. Caricato, X. Li, H. P. Hratchian, A. F. Izmaylov, J. Bloino, G. Zheng, J. L. Sonnenberg, M. Hada, M. Ehara, K. Toyota, R. Fukuda, J. Hasegawa, M. Ishida, T. Nakajima, Y. Honda, O. Kitao, H. Nakai, T. Vreven, J. A. Montgomery, Jr., J. E. Peralta, F. Ogliaro, M. Bearpark, J. J. Heyd, E. Brothers, K. N. Kudin, V. N. Staroverov, R. Kobayashi, J. Normand, K. Raghavachari, A. Rendell, J. C. Burant, S. S. Iyengar, J. Tomasi, M. Cossi, N. Rega, J. M. Millam, M. Klene, J. E. Knox, J. B. Cross, V. Bakken, C. Adamo, J. Jaramillo, R. Gomperts, R. E. Stratmann, O. Yazyev, A. J. Austin, R. Cammi, C. Pomelli, J. W. Ochterski, R. L. Martin, K. Morokuma, K. V. G. akrzewski, G. A. Voth, P. Salvador, J. J. Dannenberg, S. Dapprich, A. D. Daniels, O. Farkas, J. B. Foresman, J. V. Ortiz, J. Cioslowski and D. J. Fox, Gaussian 09 (Revision A.01), Gaussian, Inc., Wallingford CT, 2009.
- 3 A. Schäfer, C. Huber and R. Ahlrichs, *J. Chem. Phys.* 1994, **100**, 5829–5835.
- 4 M. Dolg, H. Stoll and H. Preuss, *J. Chem. Phys.* 1989, **90**, 1730–1734.
- 5 J. Tao, J. P. Perdew, V. N. Staroverov and G. E. Scuseria, *Phys. Rev. Lett.* 2003, **91**, 146401.
- 6 A. D. Becke, *Phys. Rev. A* 1988, **38**, 3098–3100.
- 7 C. Lee, W. Yang and R. G. Parr, *Phys. Rev. B* 1988, **37**, 785–789.
- 8 A. D. Becke, *J. Chem. Phys.* 1993, **98**, 5648–5652.
- 9 X.-N. Li, Z. Yuan and S.-G. He, *J. Am. Chem. Soc.* 2014, **136**, 3617–3623.
- 10 J.-B. Ma, B. Xu, J.-H. Meng, X.-N. Wu, X.-L. Ding, X.-N. Li and S.-G. He, *J. Am. Chem. Soc.* 2013, **135**, 2991–2998.
- 11 G. D. Purvis III and R. J. Bartlett, *J. Chem. Phys.* 1982, **76**, 1910–1918.
- 12 G. E. Scuseria, C. L. Janssen and H. F. Schaefer III, *J. Chem. Phys.* 1988, **89**, 7382–7387.
- 13 J. A. Pople, M. Head-Gordon and K. Raghavachari, *J. Chem. Phys.* 1987, **87**, 5968–5975.
- 14 H. B. Schlegel, *J. Comput. Chem.* 1982, **3**, 214–218.
- 15 E. D. Glendening, A. E. Reed, J. E. Carpenter and F. Weinhold, NBO, version 3.1, 1996.
- 16 J. B. Pedley and E. M. Marshall, *J. Phys. Chem. Ref. Data* 1983, **12**, 967–1031.
- 17 K. P. Huber and G. Herzberg, *Molecular Spectra and Molecular Structure. IV. Constants of Diatomic Molecules* Van Nostrand Reinhold: New York, 1979.
- 18 F. Aguirre, J. Husband, C. J. Thompson and R. B. Metz, *Chem. Phys. Lett.* 2000, **318**, 466–470.
- 19 G. L. Gutsev, L. Andrews and C. W. Bauschlicher, Jr., *Theor. Chem. Acc.* 2003, **109**, 298–308.
- 20 <http://webbook.nist.gov/chemistry>.
- 21 K. M. Ervin, I. Anusiewicz, P. Skurski, J. Simons and W. C. Lineberger, *J. Phys. Chem. A* 2003, **107**, 8521–8529.
- 22 D. R. Lide, *Handbook of Chemistry and Physics*; CRC Press LLC, 2003, p9–53.
